# Supplementary material
Source: Springer Nature journal article supplement (https://www.springermedizin.de/resource/supplementary/12936_2008_651_MOESM4_ESM.pdf/9547918)
Supplement: MOESM4 [file 9547918]

**Incremental cost per malaria positive patient treated: base case age breakdown**

1

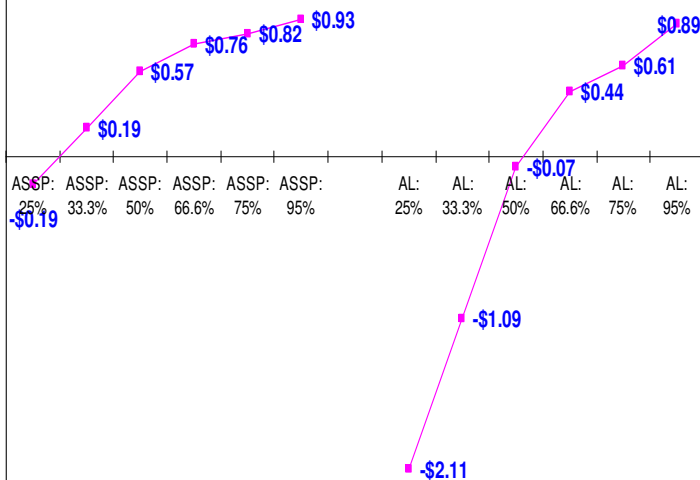

**Incremental cost per malaria patient treated: age breakdown 1**

2

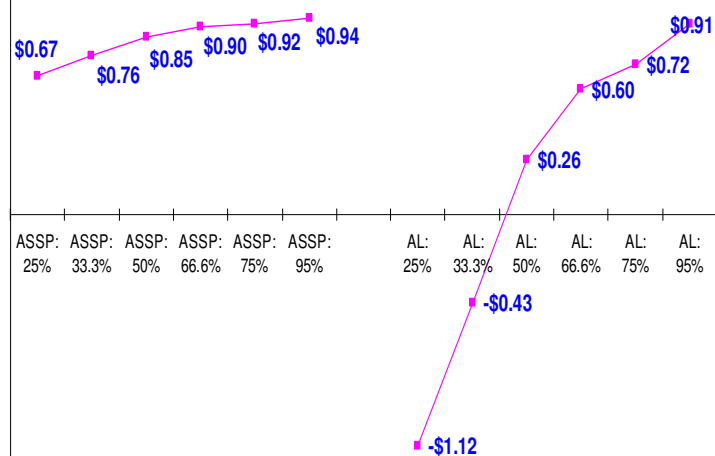

**Incremental cost per malaria patient treated: age breakdown 2**

3

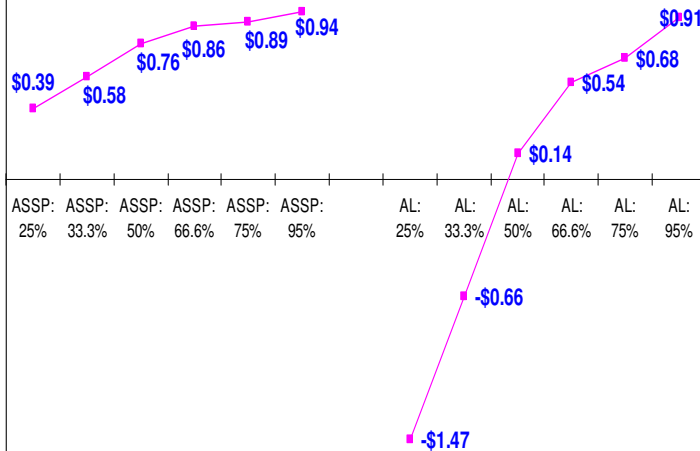

**Incremental cost per malaria patient treated: age breakdown 3**

4

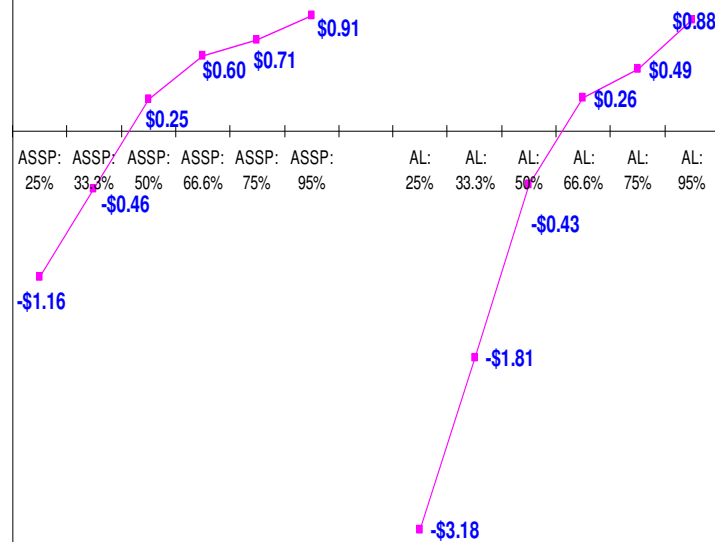

**Base case Age breakdown**

for ASSP 28.3%; 15.3%; 56.4% and for AL 23.6%; 9.1%; 8.7%; 58.6%

**Age breakdown 1**

for ASSP 50%; 15%; 35% and for AL 45%; 9%; 9%; 37%)

**Age breakdown 2**

for ASSP 40%; 20%; 40% and for AL 35%; 11.5%; 11.5%; 42%

**Age breakdown 3**

for ASSP 10%; 5%; 85% and for AL 5%; 4.5%; 4.5%; 86%
